# Supplementary material for: Connecting single-cell transcriptomes to projectomes in mouse visual cortex
Source: PubMed Central journal article supplement — bioRxiv. 2023 Nov 26:2023.11.25.568393. Preprint. [Version 1] doi: 10.1101/2023.11.25.568393 (PMC10760188; doi:10.1101/2023.11.25.568393), 2023-11-26
Supplement: media-4.pdf [file media-4.pdf]

## Extended Data

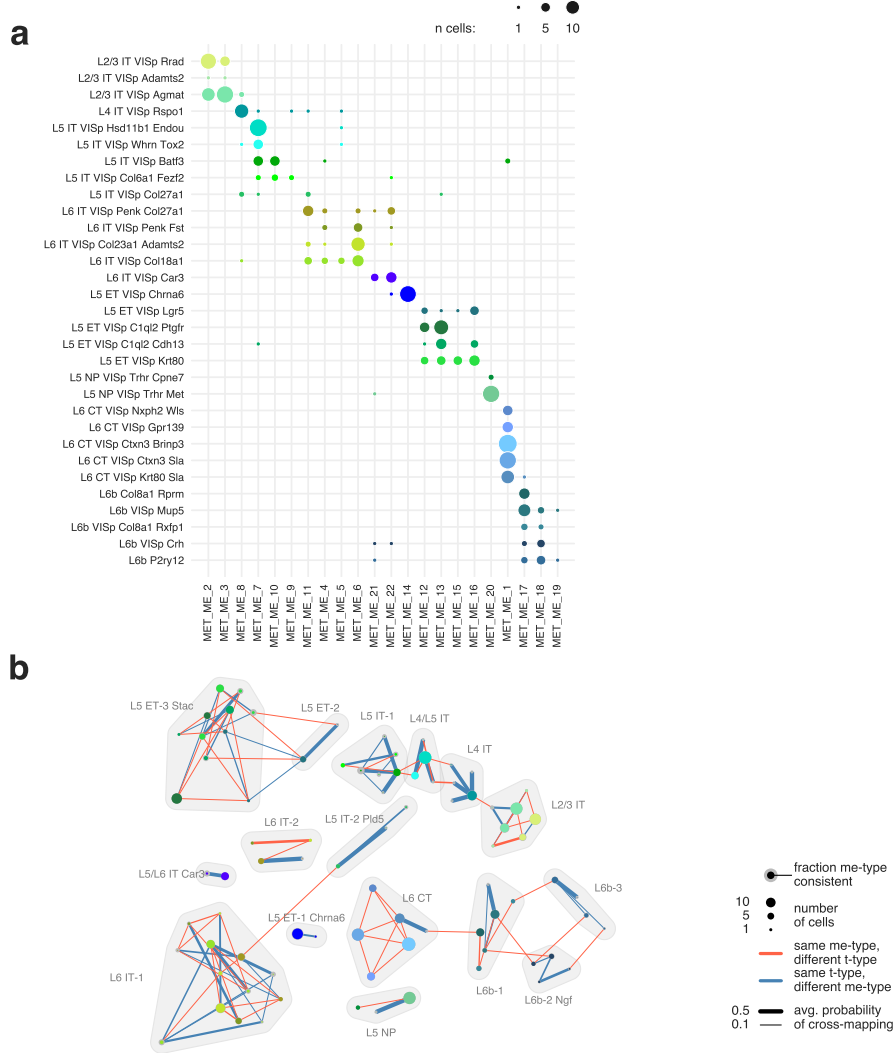

**Extended Data Figure 11: Definition of excitatory MET-types.** **a**, Relationship between T-types and ME-types. **b**, Community-detection grouping of T- and ME-type combinations into MET-types. Nodes are cells with a specific combination of ME-type and T-type (as in **a**). The size of the node indicates the number of cells with that combination of types. Edges represent cross-mapping probabilities of cells that could map to another T-type (orange line) or ME-type (blue line); thicker lines indicate higher probabilities. Shaded regions show the groupings of the ME-type/T-type combinations into MET-types.

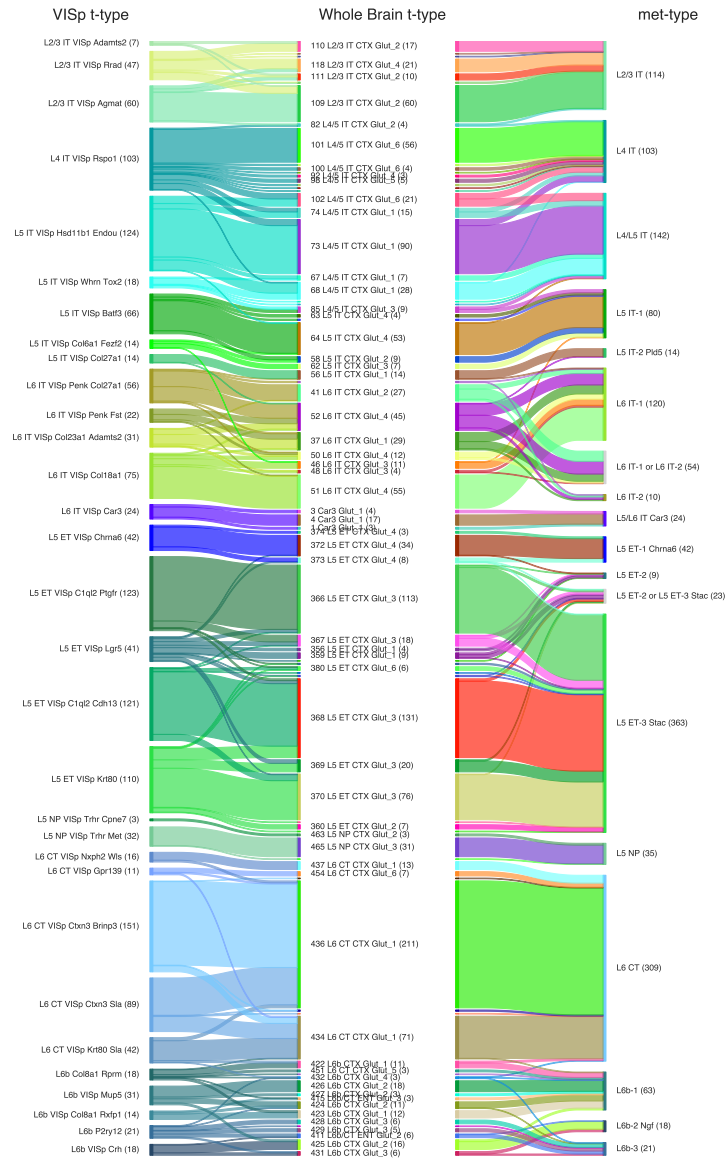

**Extended Data Figure 12:** Comparison of the mapping of Patch-seq neurons to the Tasic *et al.* [12] VISp taxonomy and to the Yao *et al.* [3] whole-brain taxonomy.







---

**Extended Data Figure 14 (preceding page): Surface and depth locations by MET-type.** **a**, Flat map visualization of visual cortical areas. **b**, Positions of all Patch-seq cells on the cortical surface. Red lines show contours of a kernel density estimate (KDE) of the total distribution. **c**, Distributions of MET-types on the cortical surface. A permutation test of the log-likelihoods for each MET-type distribution arising from the all-cell KDE (**b**) was used to estimate p-values. Only L5/L6 IT Car3 exhibited a significant difference from the all-cell distribution. **d**, Soma depth distributions of MET-types. Cortical depths were normalized to a standard set of layer thicknesses. For each MET-type, cells with all three data modalities (morphology, electrophysiology, and transcriptomics) are shown on the left, and those with only electrophysiology and transcriptomics data are shown on the right. The MET-types for the latter cells were inferred by T-type and, when available, auto-traced morphologies (see Methods).

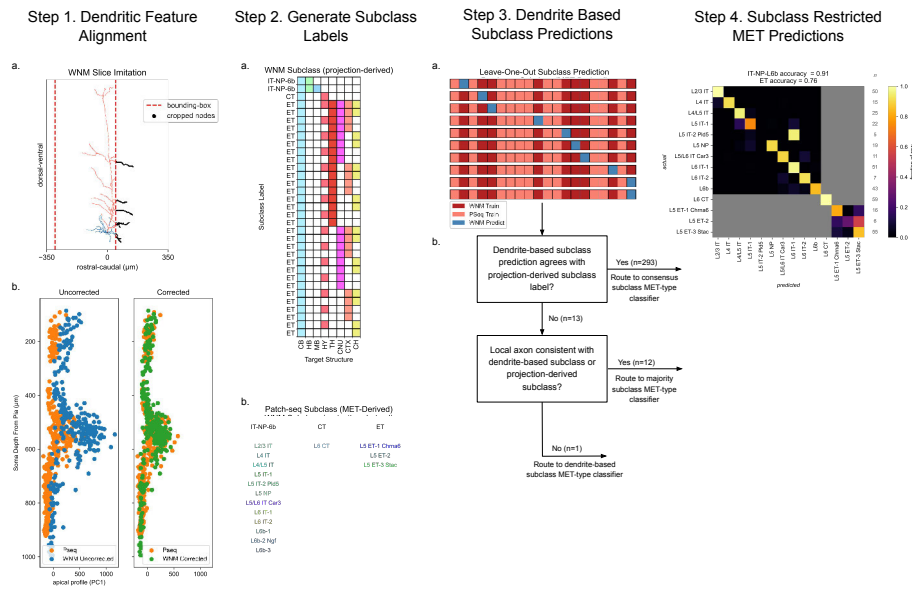

**Extended Data Figure 15: MET prediction workflow.** **Step 1a**, Uprighted WNM dendrites were cropped in the rostral-caudal dimension to replicate sample slicing in the Patch-seq data set. **Step 1b**, Features were aligned using chamfer distance minimization. For each feature, a depth by feature point cloud was created for each data set. These point clouds were subsequently aligned by imposing a linear transformation on the feature to minimize the chamfer distance between the respective point clouds. **Step 2a**, WNM projection subclass training labels (e.g., IT/NP/L6b, CT, ET) were derived from the projection targets of each individual neuron. **Step 2b**, Patch-seq projection subclass labels (e.g., IT/NP/L6b, CT, ET) were derived from MET-type labels (e.g., L5 ET-1 Chrna6). **Step 3a**, Leave-one-out subclass prediction protocol using dendrite morphology features. **Step 3b**, Flow chart for mapping samples to the correct MET-type classifier. **Step 4a**, Confusion matrix for MET-type classifiers. Cross classifier indices are grayed out.



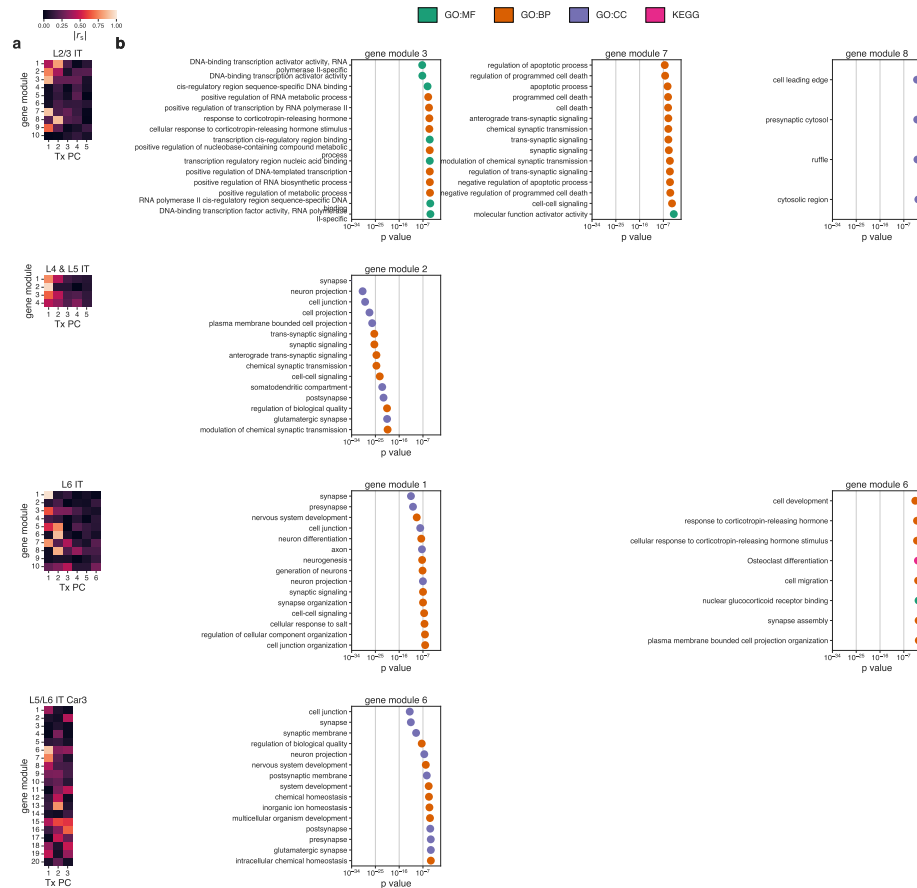

**Extended Data Figure 17: Functional associations of genes in WGCNA modules derived from IT subclasses.** **a**, Heat maps of Spearman correlations between WGCNA eigengenes and transcriptomic principal components. Both methods were performed on reference cells for each transcriptomic subclass. **b**, Gene ontology analyses were performed on gene modules that were highly correlated with a transcriptomic PC in (a). Dot plots show the 15 most significant terms from gene ontology analysis. Subontology (biological process, cellular component, molecular function, Kyoto Encyclopedia of Genes and Genomes (KEGG) pathway database) is indicated by color.

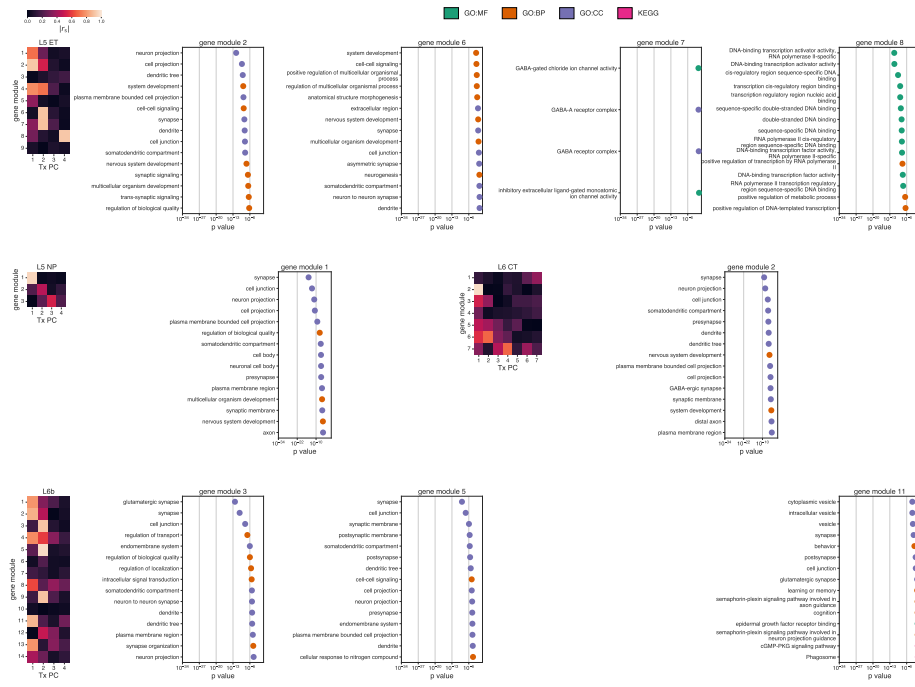

**Extended Data Figure 18: Functional associations of genes in WGCNA modules derived from ET, NP, CT and L6b subclasses.** Heat maps show Spearman correlations between WGCNA eigengenes and transcriptomic principal components. Both methods were performed on reference cells for each transcriptomic subclass. Gene ontology analyses were performed on gene modules that were highly correlated with a transcriptomic PC. Dot plots show the 15 most significant terms from gene ontology analysis. Sub-ontology (biological process, cellular component, molecular function, Kyoto Encyclopedia of Genes and Genomes (KEGG) pathway database) is indicated by color.

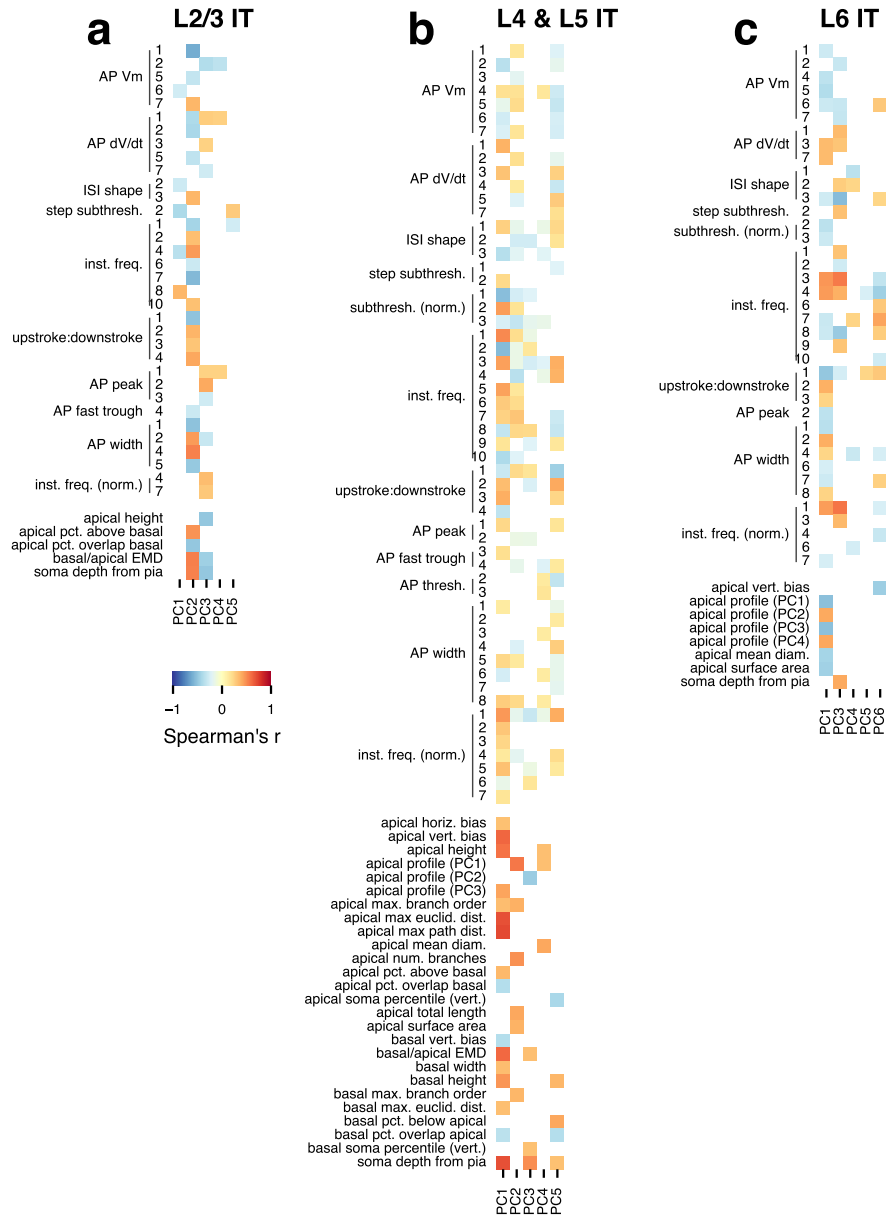

**Extended Data Figure 19: Cross-modal correlations within IT subclasses.** Statistically significant Spearman correlations between transcriptomic principal components (PCs) and electrophysiological (upper) and morphological (lower) features are shown in the heat maps for the L2/3 IT (a), L4 and L5 IT (b), and L6 IT (c) subclasses. Only PCs and features with at least one significant correlation are shown.

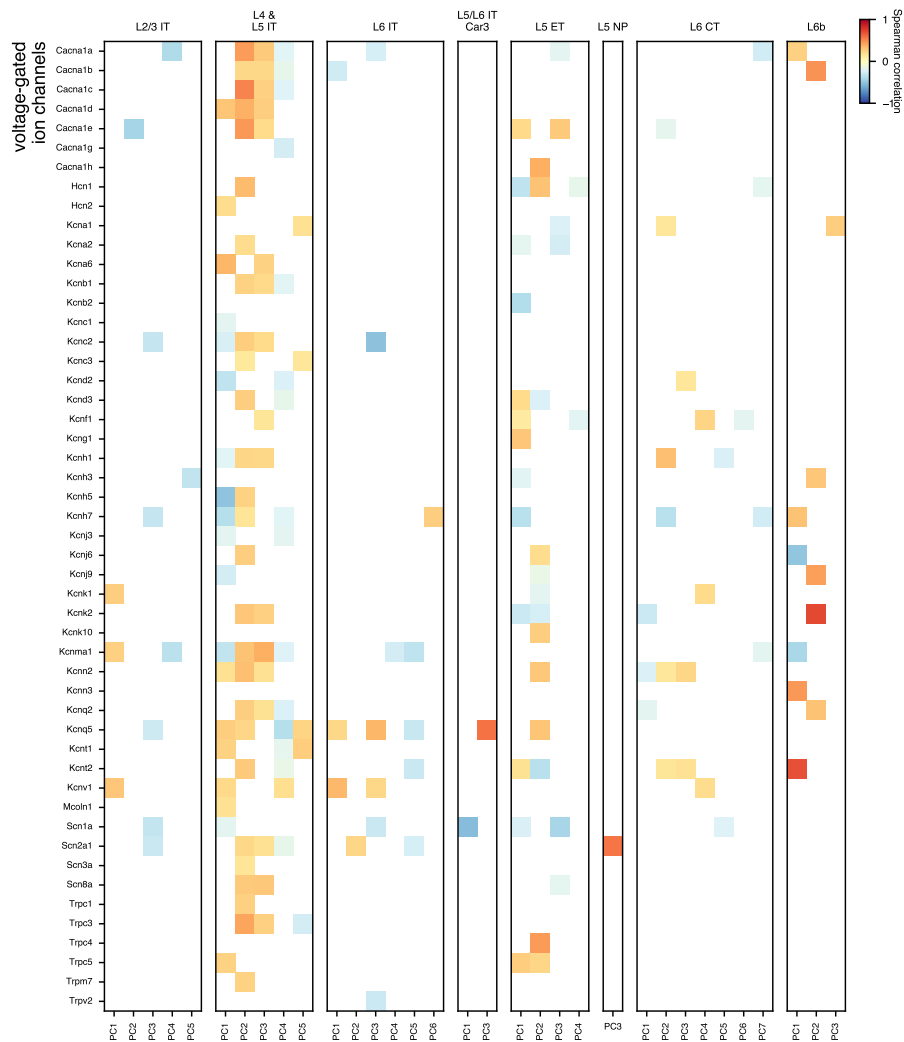

**Extended Data Figure 20: Correlations between voltage-gated ion channel gene expression and transcriptomic PCs.** Spearman correlations were measured between the transcriptomic PCs and voltage-gated ion channel gene expression (list from Földy *et al.* [17]). Correlations are shown for the Patch-seq data set. Only statistically significant correlations found in both the Patch-seq and reference FACS data sets are shown. Significance was assessed after multiple comparison correction of p-values. PCs and genes with no significant correlations are omitted.



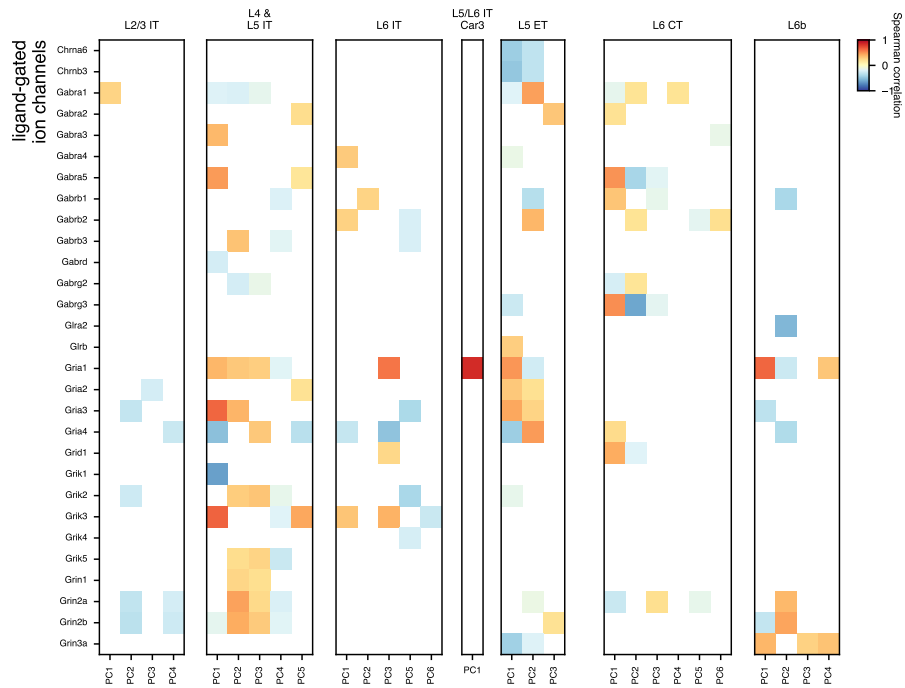

**Extended Data Figure 21: Correlations between ligand-gated ion channel gene expression and transcriptomic PCs.** Spearman correlations were measured between the transcriptomic PCs and ligand-gated ion channels gene expression (list from Földy *et al.* [17]). Correlations are shown for the Patch-seq data set. Only statistically significant correlations found in both the Patch-seq and reference FACS data sets are shown. Significance was assessed after multiple comparison correction of p-values. PCs and genes with no significant correlations are omitted.

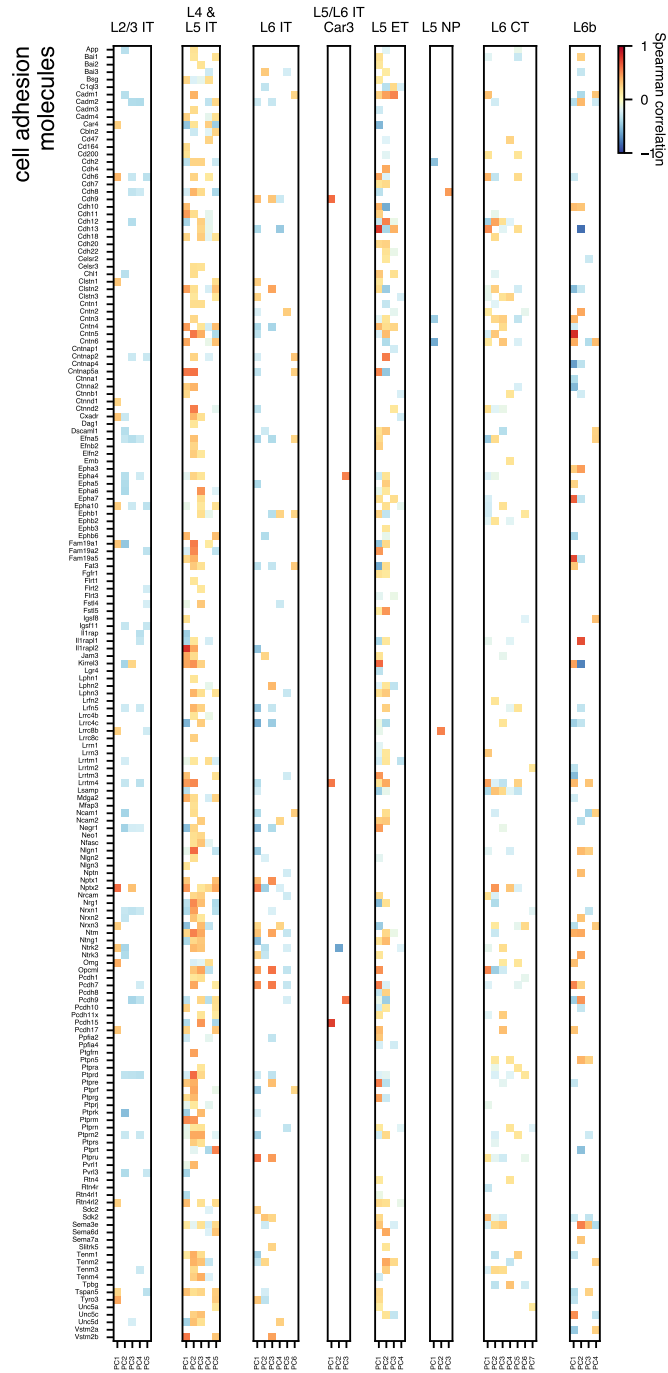

---

**Extended Data Figure 22 (preceding page): Correlations between cell adhesion molecule gene expression and transcriptomic PCs.** Spearman correlations were measured between the transcriptomic PCs and cell adhesion molecule gene expression (list from Földy *et al.* [17]). Correlations are shown for the Patch-seq data set. Only statistically significant correlations found in both the Patch-seq and reference FACS data sets are shown. Significance was assessed after multiple comparison correction of p-values. PCs and genes with no significant correlations are omitted.

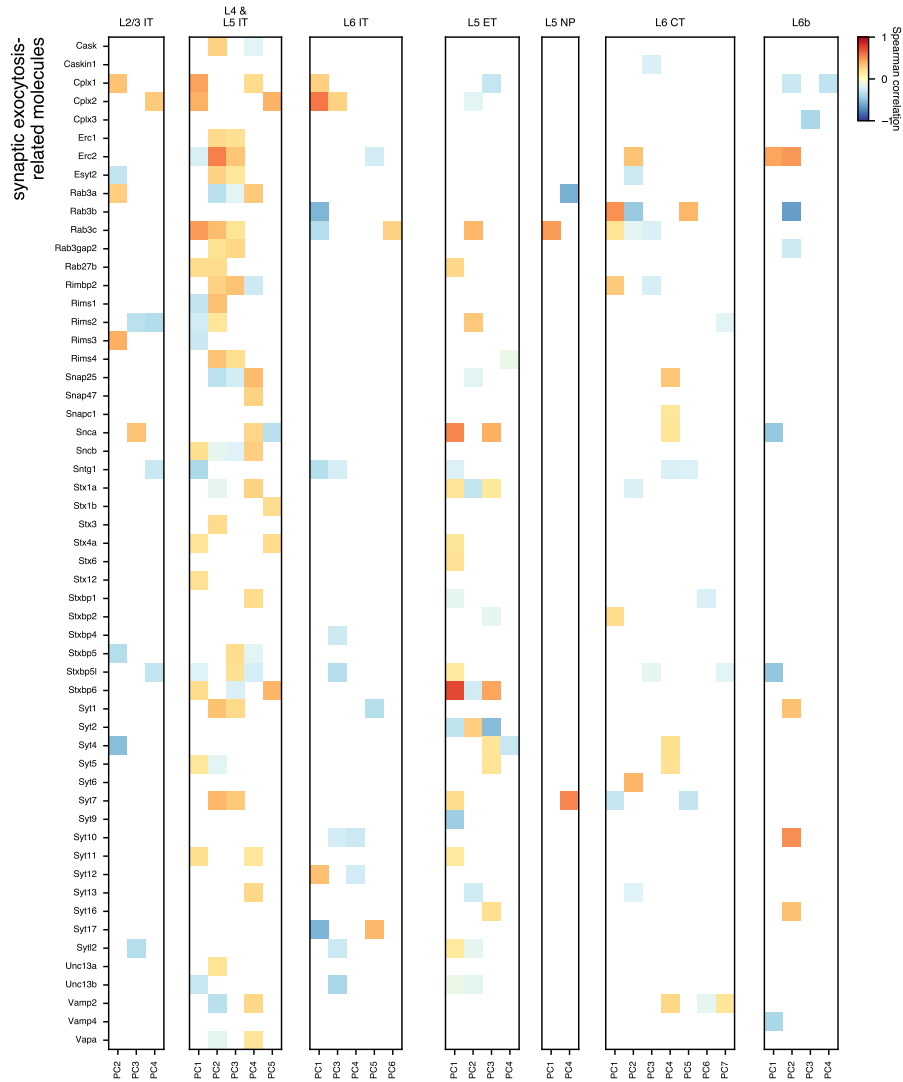

**Extended Data Figure 23: Correlations between synaptic exocytosis-related gene expression and transcriptomic PCs.** Spearman correlations were measured between the transcriptomic PCs (Tx PCs) and synaptic exocytosis-related gene expression (list from Földy *et al.* [17]). Correlations are shown for the Patch-seq data set. Only statistically significant correlations found in both the Patch-seq and reference FACS data sets are shown. Significance was assessed after multiple comparison correction of p-values. PCs and genes with no significant correlations are omitted.



---

**Extended Data Figure 24 (preceding page): Activity-dependent genes contribute to transcriptomic variation within subclasses.** **a**, UMAP plots of the reference FACS data showing transcriptomic subclasses (left) and variation in activity-dependent genes summarized by a response gene principal component. The response gene first principal component (PC-1) was calculated from the expression across all visual cortex excitatory cells of 108 early- and late-response genes identified as being increased after visual stimulus by Hrvatin *et al.* [75]. Variation in this activity-related signal is evident in several subclasses, such as L2/3 IT and L6 IT. **b**, Correlations between the first (top) and second (bottom) transcriptomic principal components in the L2/3 IT subclass and the response gene PC-1. The first component is highly correlated, with the T-type L2/3 IT VISp Rad exhibiting higher values and L2/3 IT VISp Adams2 exhibiting lower values. **c**, Correlations between transcriptomic principal components across all subclasses. **d**, Results of reclustering the reference FACS data after removing transcriptomic dimensions that exhibit high correlation ( $>0.7$ ) with the response gene PC-1. Note that two L2/3 IT T-types and two L6 IT T-types are merged by this reclustering. **e**, Comparison of early- and late-response gene expression between the FACS and Patch-seq data sets. Each point represents the mean gene expression of one of the 108 genes in one of the eight transcriptomic subclasses. Several genes exhibited lower expression consistently across subclasses in the Patch-seq cells (top) while others exhibited higher expression (bottom) in the Patch-seq data set (see Methods). **f**, Example response gene expression in FACS and Patch-seq data sets by transcriptomic subclass.

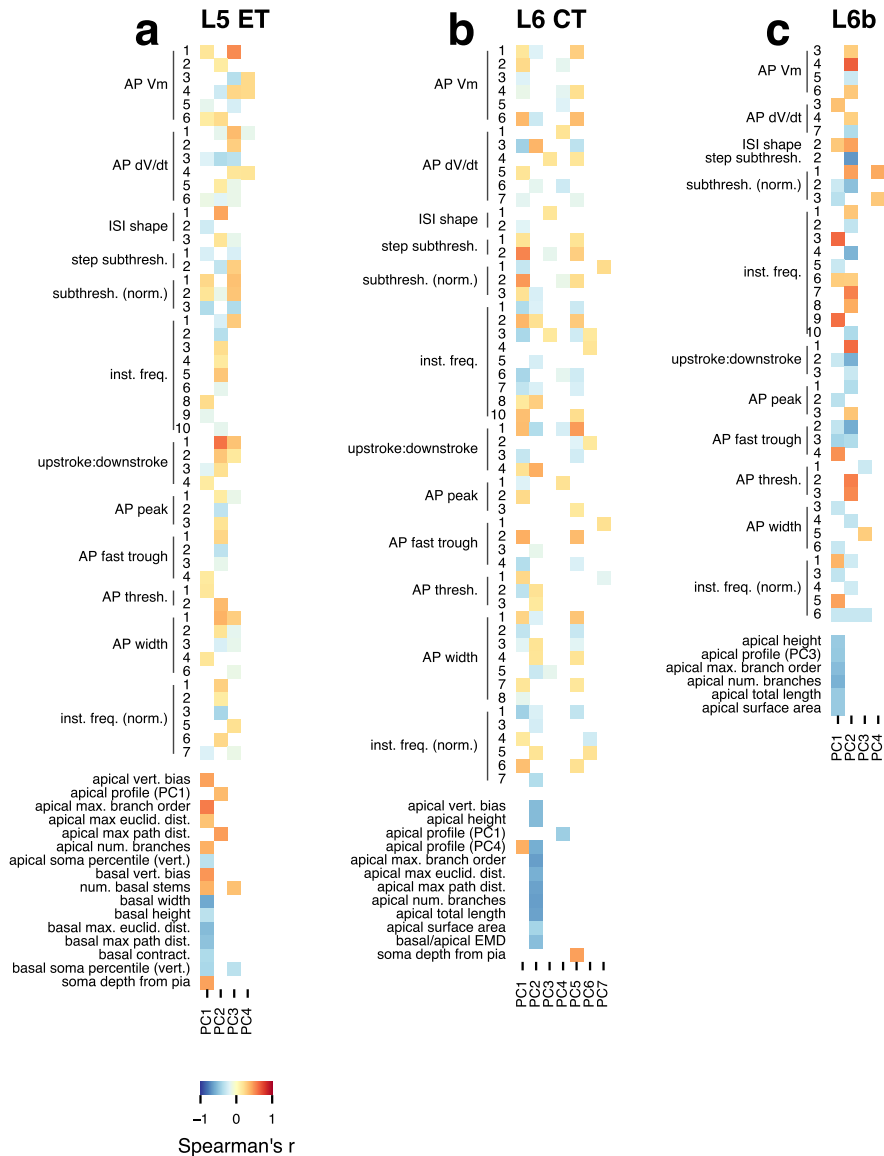

**Extended Data Figure 25: Cross-modal correlations within ET, CT, and L6b subclasses.** Statistically significant Spearman correlations between transcriptomic principal components (PCs) and electrophysiological (upper) and morphological (lower) features are shown in the heat maps for the L5 ET (a), L6 CT (b), and L6b (c) subclasses. Only PCs and features with at least one significant correlation are shown.

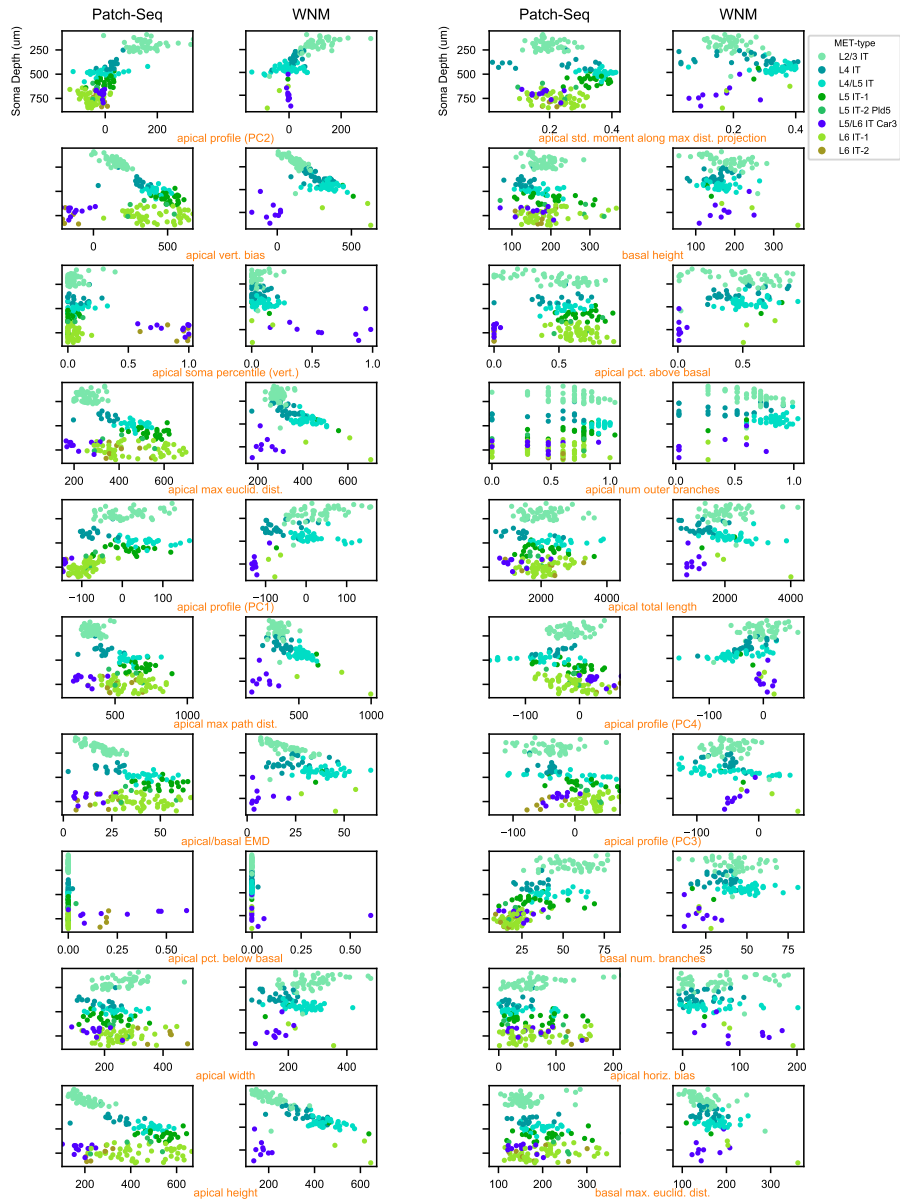

**Extended Data Figure 26: Comparison of dendritic morphology features between Patch-seq and WNM IT MET-types.** The graphs depict the relationship between soma depth from pia and the twenty most informative features for distinguishing IT MET-types, as determined by the Gini index.



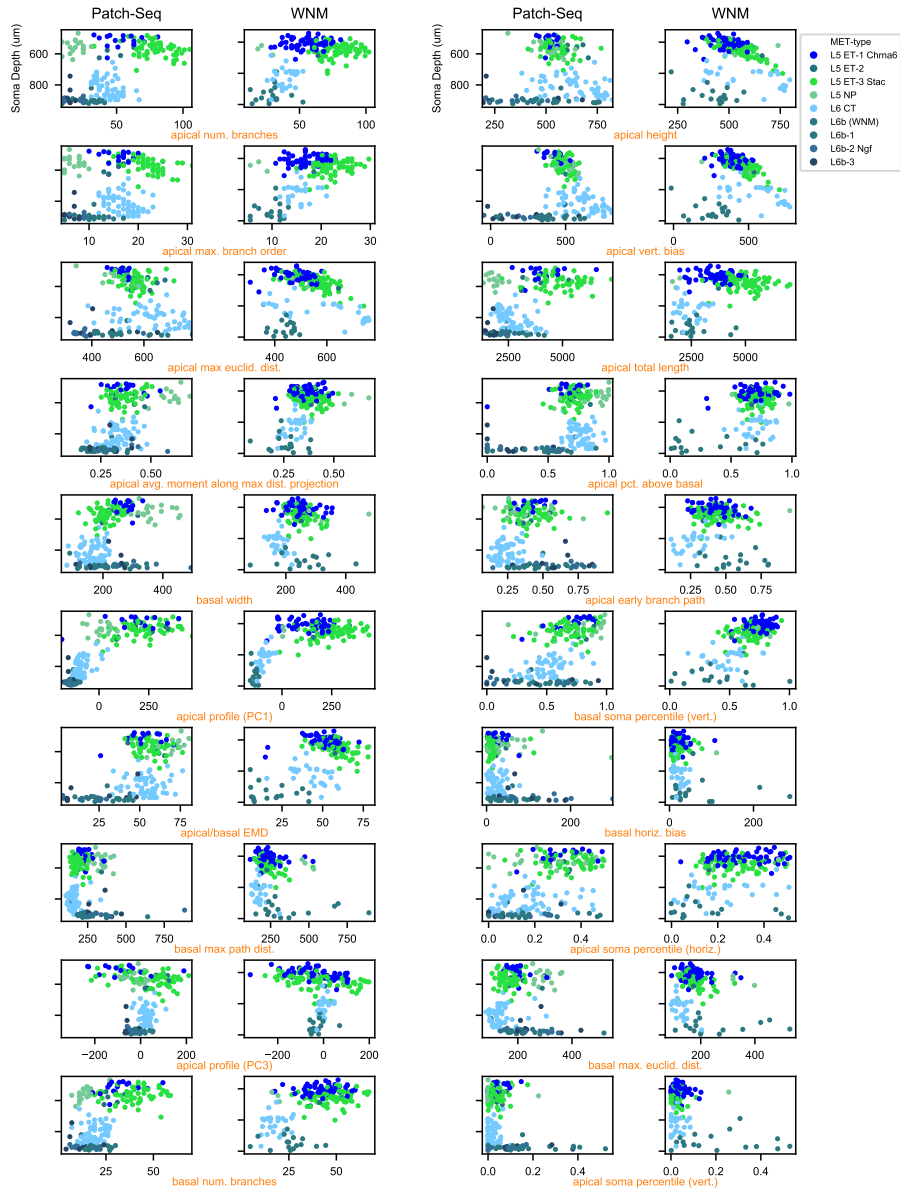

**Extended Data Figure 27: Comparison of dendritic morphology features between Patch-seq and WNM non-IT MET-types.** The graphs depict the relationship between soma depth from pia and the twenty most informative features for distinguishing non-IT MET-types, as determined by the Gini index.

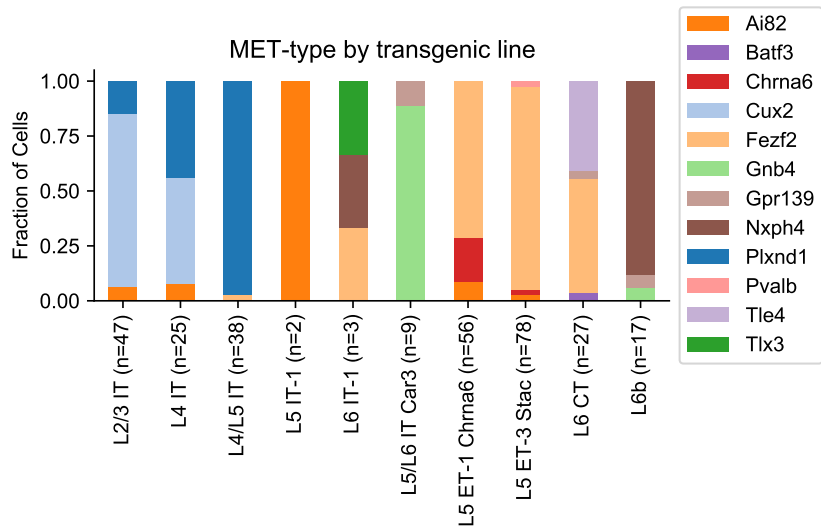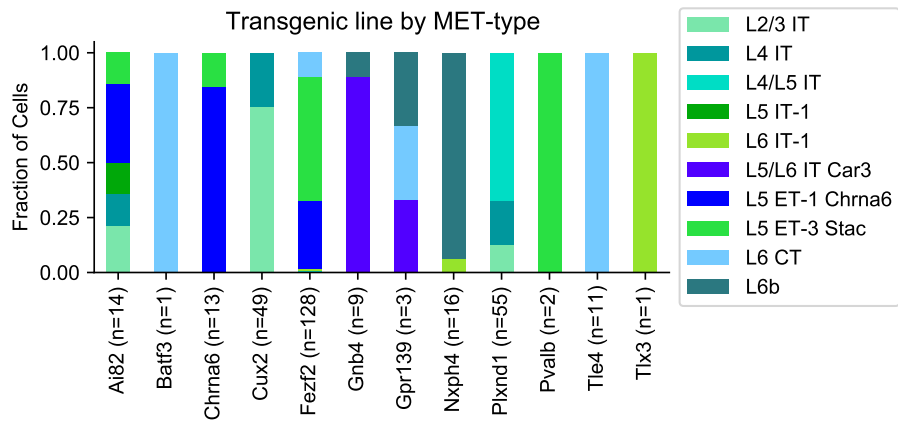

**Extended Data Figure 28: Predicted MET-type by transgenic line and transgenic line by predicted MET-type**

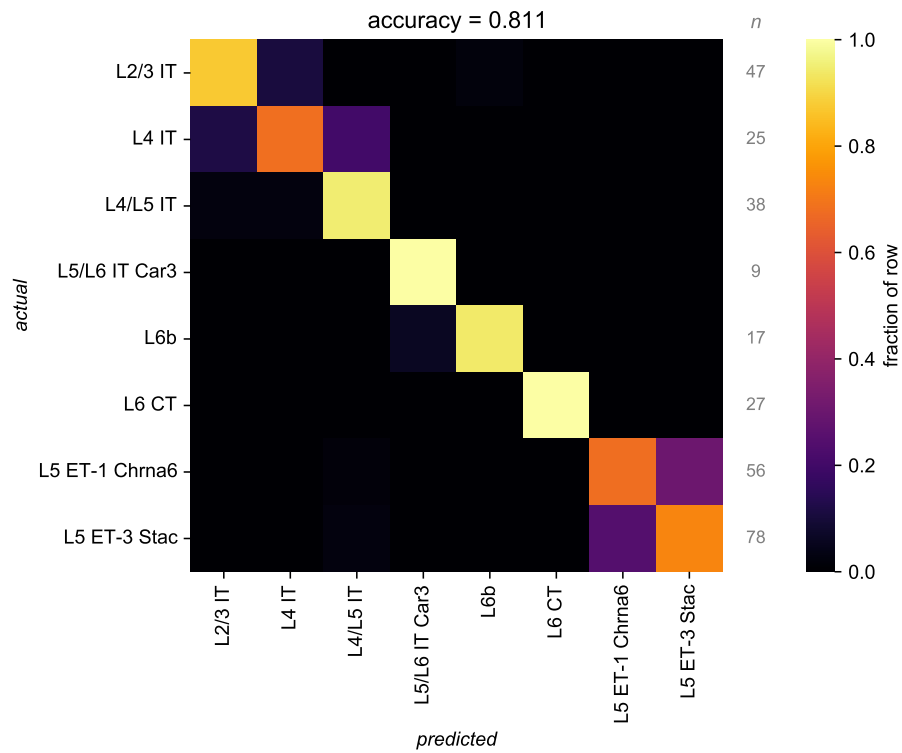

**Extended Data Figure 29: Local axon predicts predicted MET-type.** Local axon features were used to train a random forest classifier to classify the predicted MET-type labels.

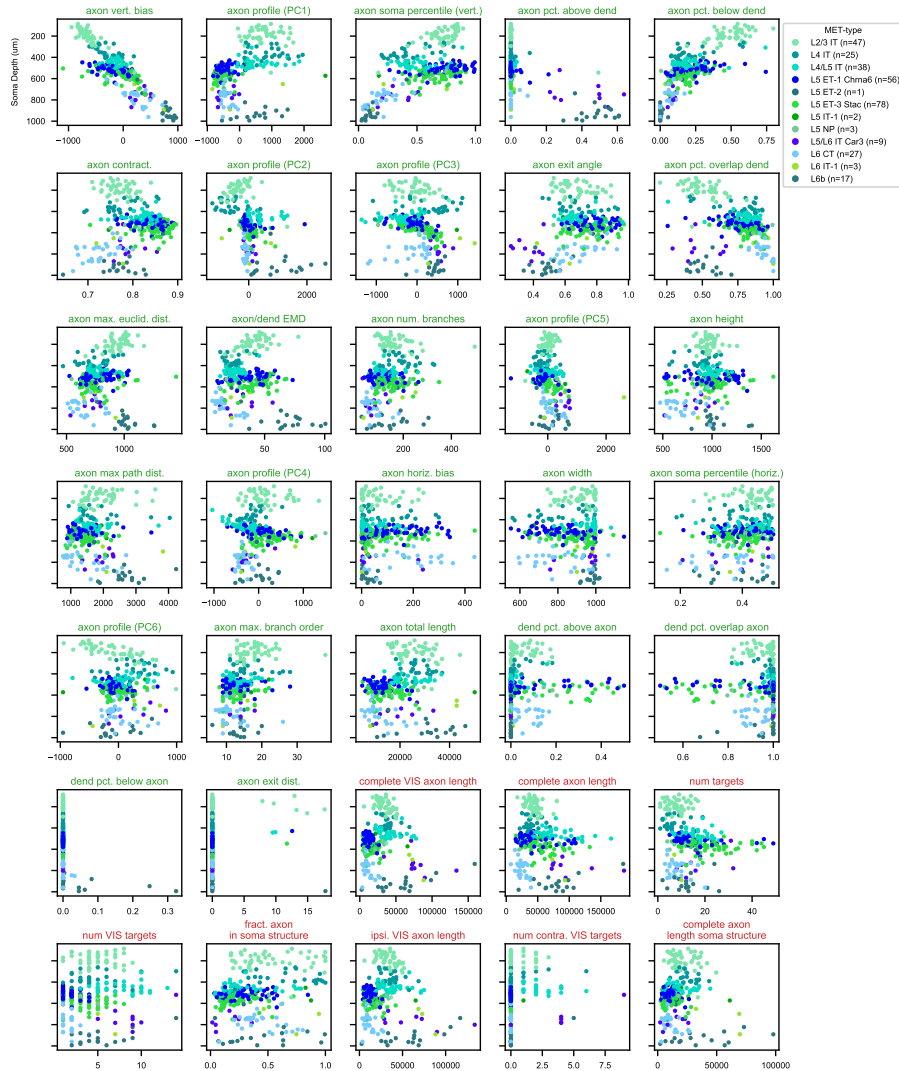

**Extended Data Figure 30: Comparison of local (green titles) and whole (red titles) axon morphology features across predicted MET-types. The graphs depict the relationship between soma depth from pia and each feature.**

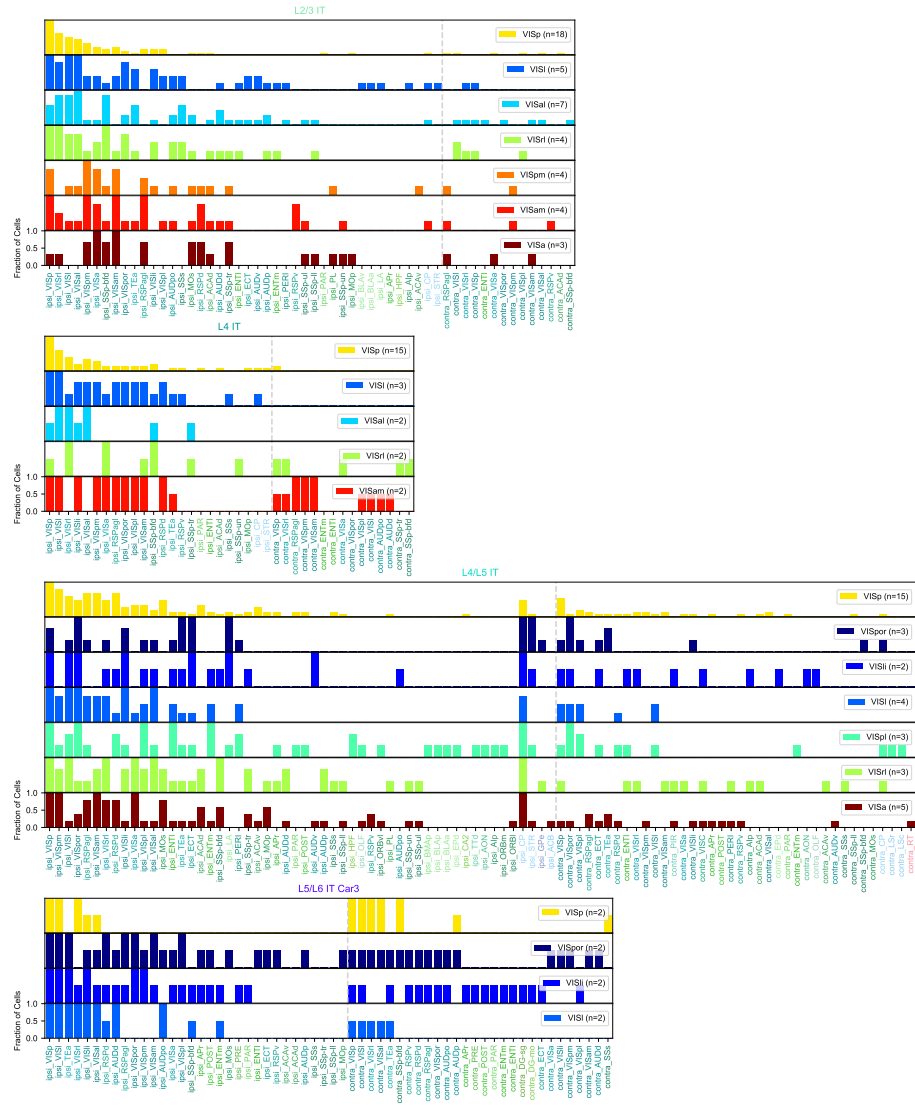

**Extended Data Figure 31: IT predicted MET-type projection summaries.** Fraction of cells that project to target regions separated by MET-type and soma structure.

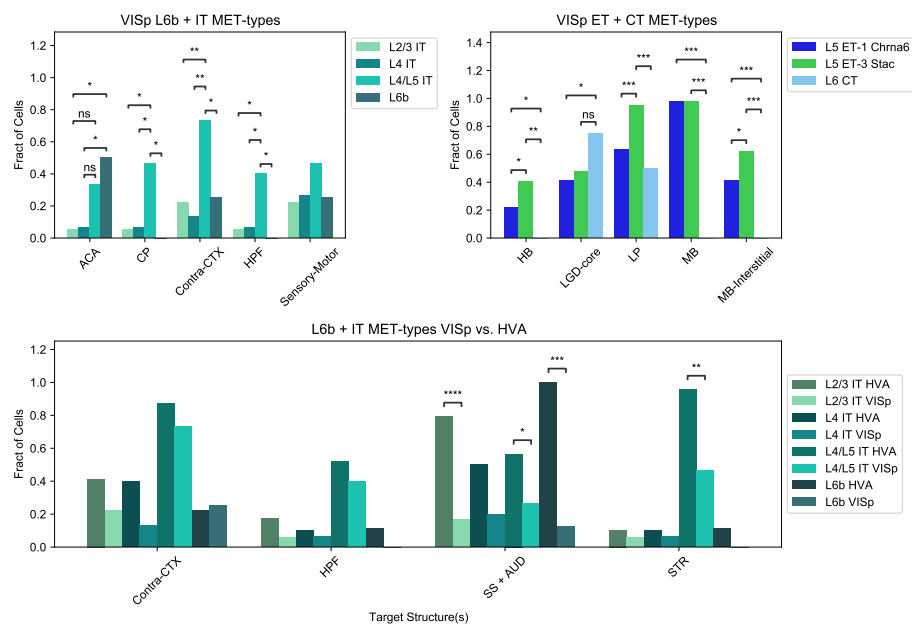

**Extended Data Figure 32: Differences in projections at the population level.** Monte Carlo permutation tests were run over 10,000 iterations to determine significant differences in the fraction of cells that project to specified target regions from VISp (top). Within MET-types, differences across VISp and HVA populations were observed (bottom).

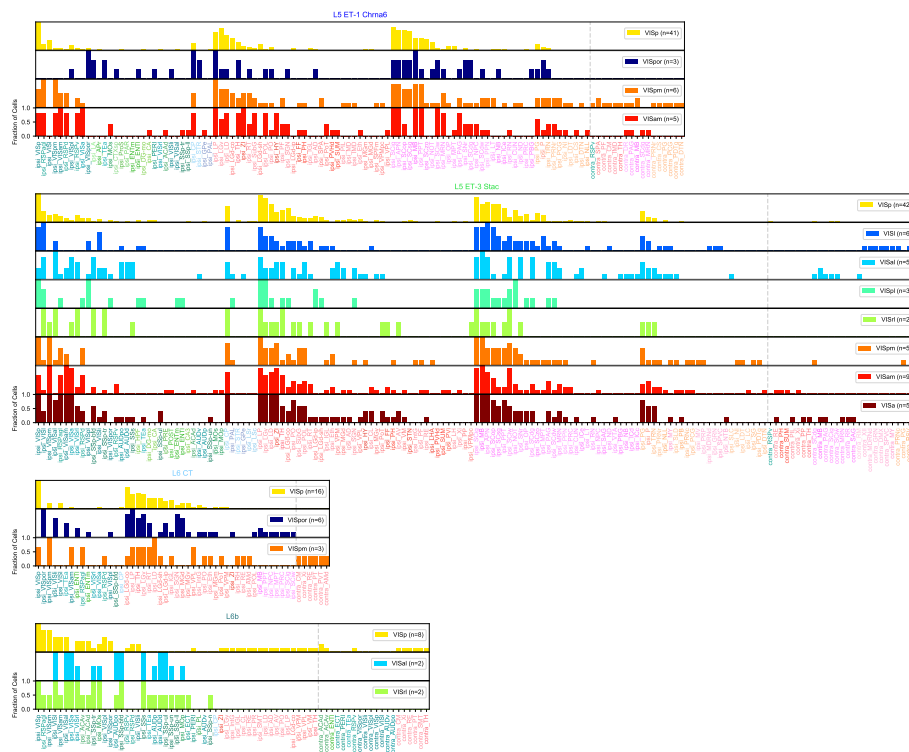

**Extended Data Figure 33: Non-IT predicted MET-type projection summaries.** Fraction of cells that project to target regions separated by MET-type and soma structure.

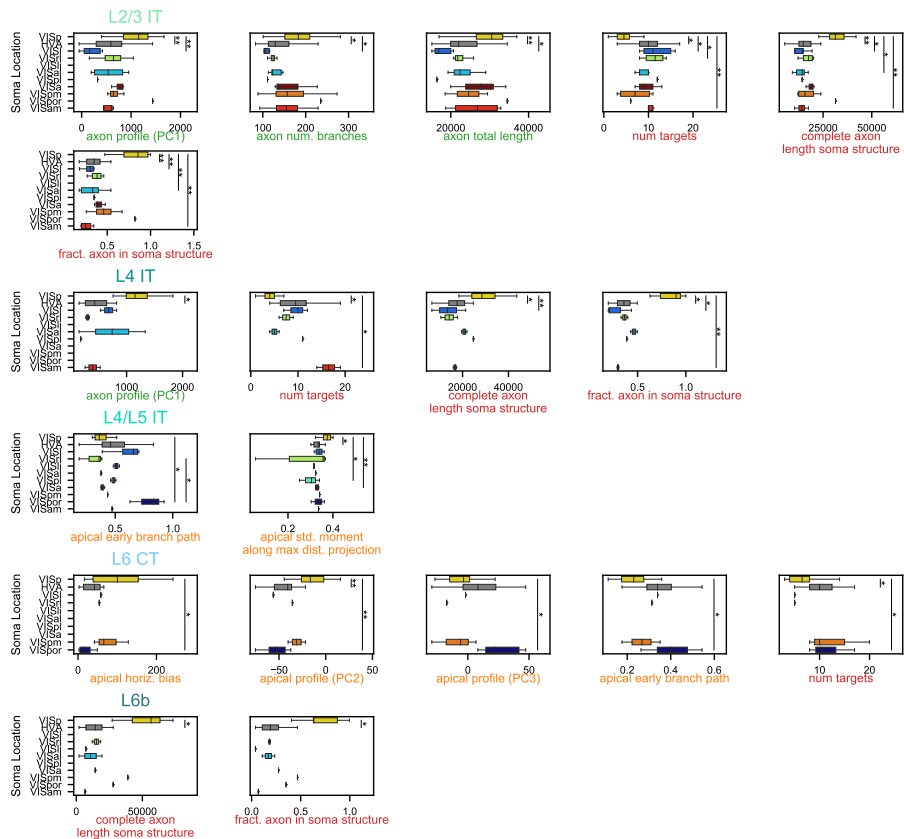

**Extended Data Figure 34: Local axon (green), complete/whole neuron axon (red) and dendrite (orange) features with observed differences across VIS regions in non-ET MET-types.** Significant differences were found using the Kruskal-Wallis test followed by Benjamini-Hochberg corrected post-hoc Dunn tests.



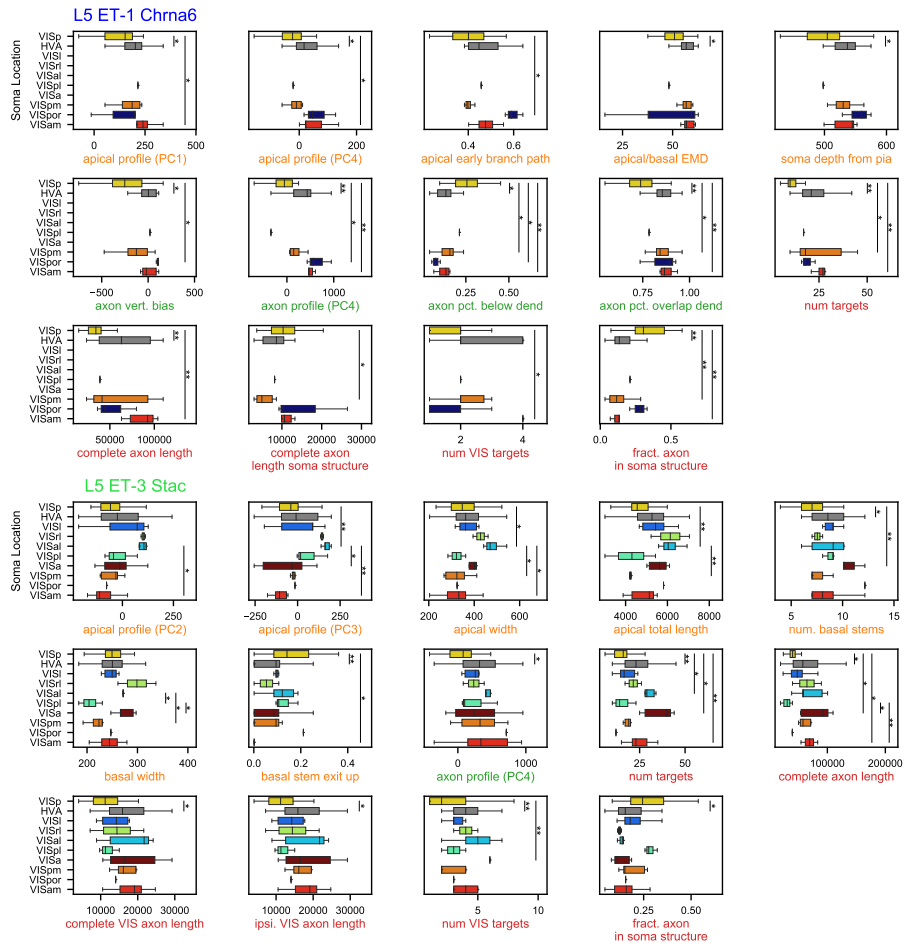

**Extended Data Figure 35: Local axon (green), complete/whole neuron axon (red) and dendrite (orange) features with observed differences across VIS regions in ET MET-types. Significant differences were found using the Kruskal-Wallis test followed by Benjamini-Hochberg corrected post-hoc Dunn tests.**

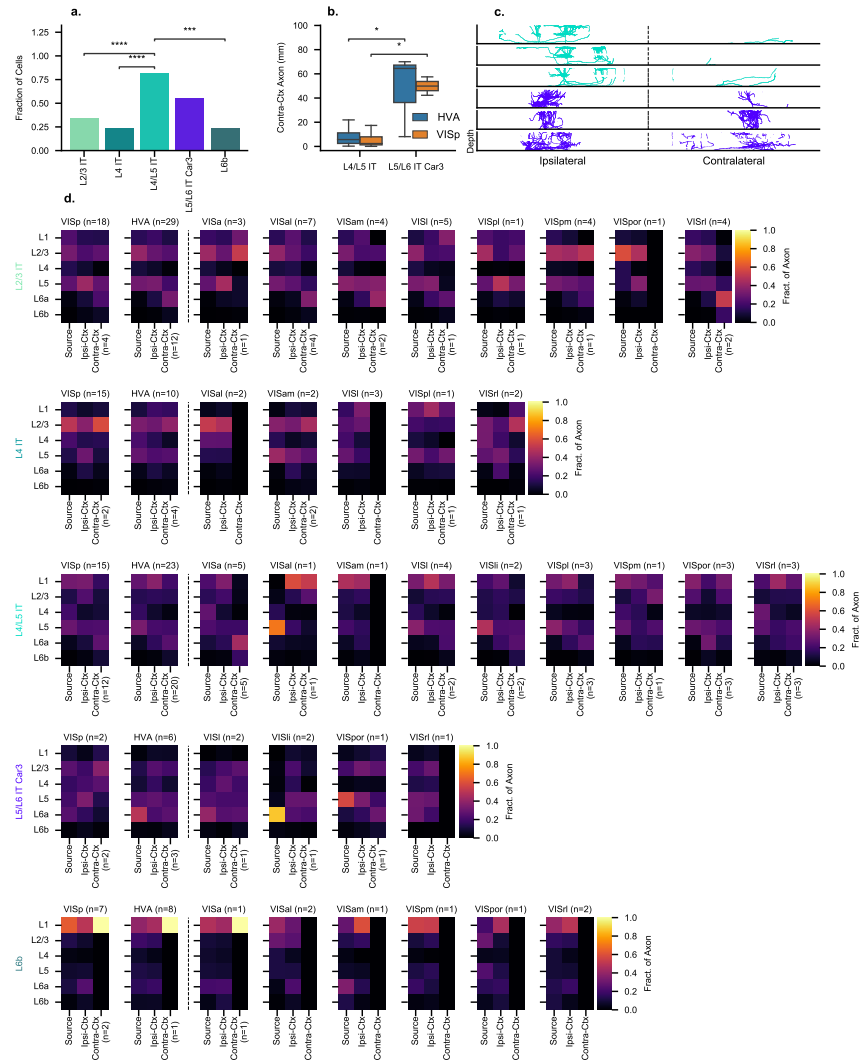

**Extended Data Figure 36: Summary of cortical projections across IT and L6b MET-types.** **a**, Monte Carlo permutation tests were run over 10,000 iterations to determine significant differences in the fraction of cells that target contralateral cortex. **b**, Kruskal-Wallis and post hoc Dunn tests were conducted to show significant differences in total contralateral axon length. **c**, Views of contralaterally projecting morphologies from L4/L5 IT and L5/L6 IT Car3 through the cortical depth. **d**, Laminar projection summaries are displayed for cells from each MET-type and soma structure. The Source label represents the proportion of axon within the structure containing a cell's soma. Ipsi-Ctx represents the proportion of axon in the ipsilateral cortex that lies outside of the source structure. Contra-Ctx represents the fraction of axon in the contralateral cortex when present.

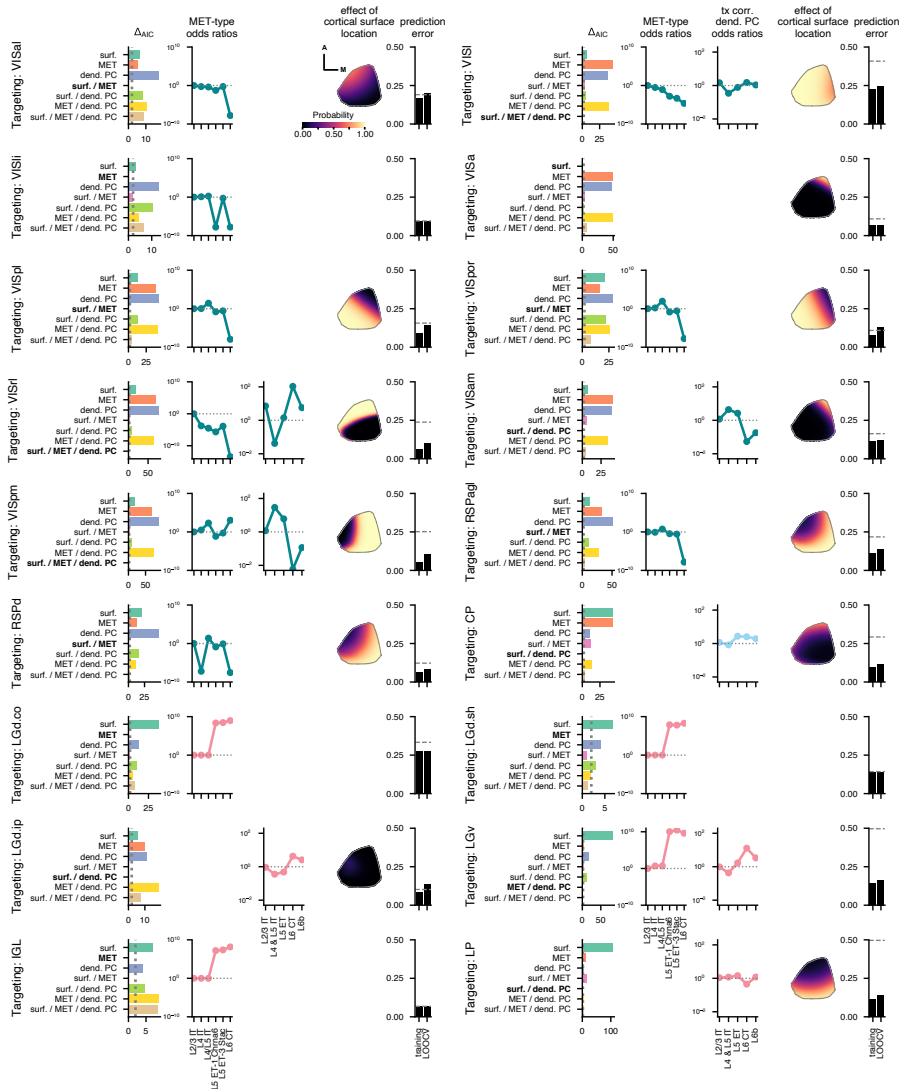

**Extended Data Figure 37 (preceding page): Logistic regression models for predicted brain region targets, part 1.** For each target region, the Akaike information criterion (AIC) was used for model selection; the model with the fewest parameters and a  $\Delta_{AIC}$  value below 2 (dotted line) was chosen (bold text label in leftmost plot). When used for a given model, the odds ratios for the predicted MET-type are shown. Also when used, the odds ratios for the transcriptomic-correlated dendritic PCs are shown (odds ratios indicate the change in the odds ratio per unit of the given PC). If surface location is used, the effects of location within VISp on targeting probability is displayed; the probabilities were calculated for the MET-type with the highest odds ratio and the average dendritic PC values across all cells (if part of the model). Prediction errors are calculated for the training data and by leave-one-out cross-validation (LOOCV) with a probability threshold of 0.5. The prediction error for a naive classifier that always chooses the more likely option (targeting or not targeting) is shown by the dashed line.

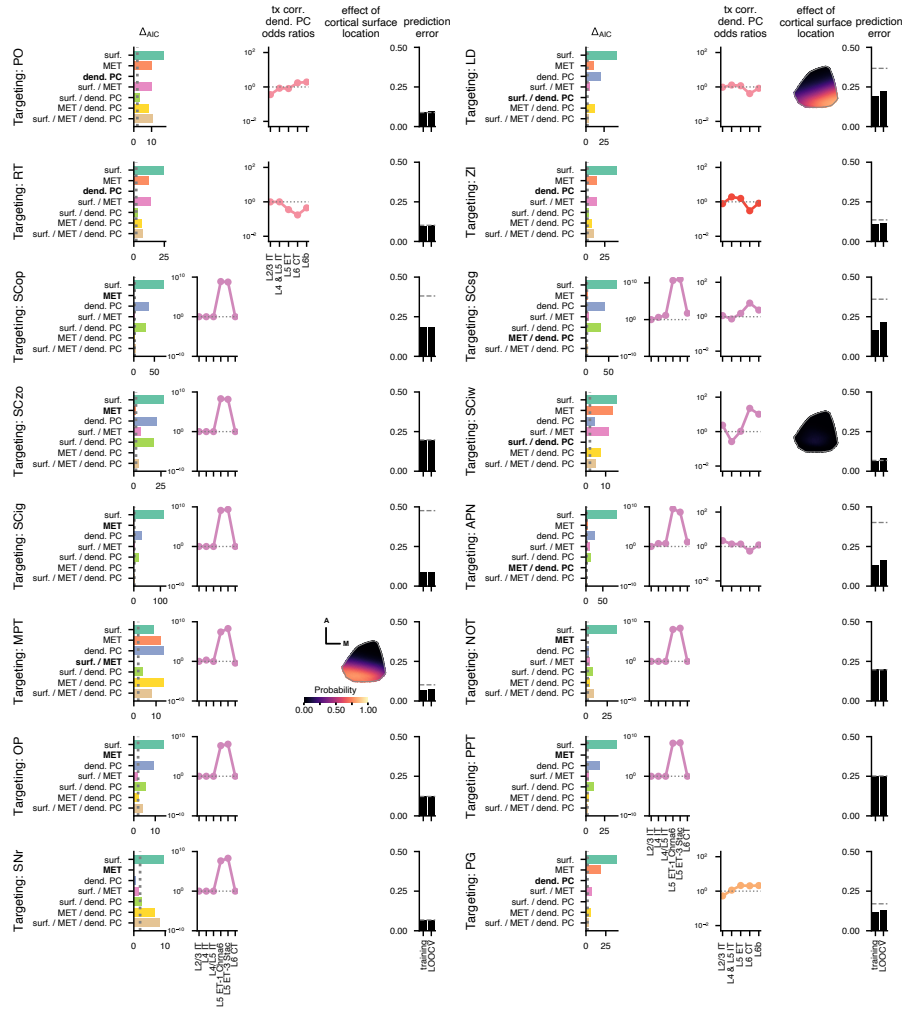

---

**Extended Data Figure 38 (preceding page): Logistic regression models for predicted brain region targets, part 2.** For each target region, the Akaike information criterion (AIC) was used for model selection; the model with the fewest parameters and a  $\Delta_{\text{AIC}}$  value below 2 (dotted line) was chosen (bold text label in leftmost plot). When used for a given model, the odds ratios for the predicted MET-type are shown. Also when used, the odds ratios for the transcriptomic-correlated dendritic PCs are shown (odds ratios indicate the change in the odds ratio per unit of the given PC). If surface location is used, the effects of location within VISp on targeting probability is displayed; the probabilities were calculated for the MET-type with highest probability and the average dendritic PC values across all cells (if part of the model). Prediction errors are calculated for the training data and by leave-one-out cross-validation (LOOCV) with a probability threshold of 0.5. The prediction error for a naive classifier that always chooses the more likely option (targeting or not targeting) is shown by the dashed line.

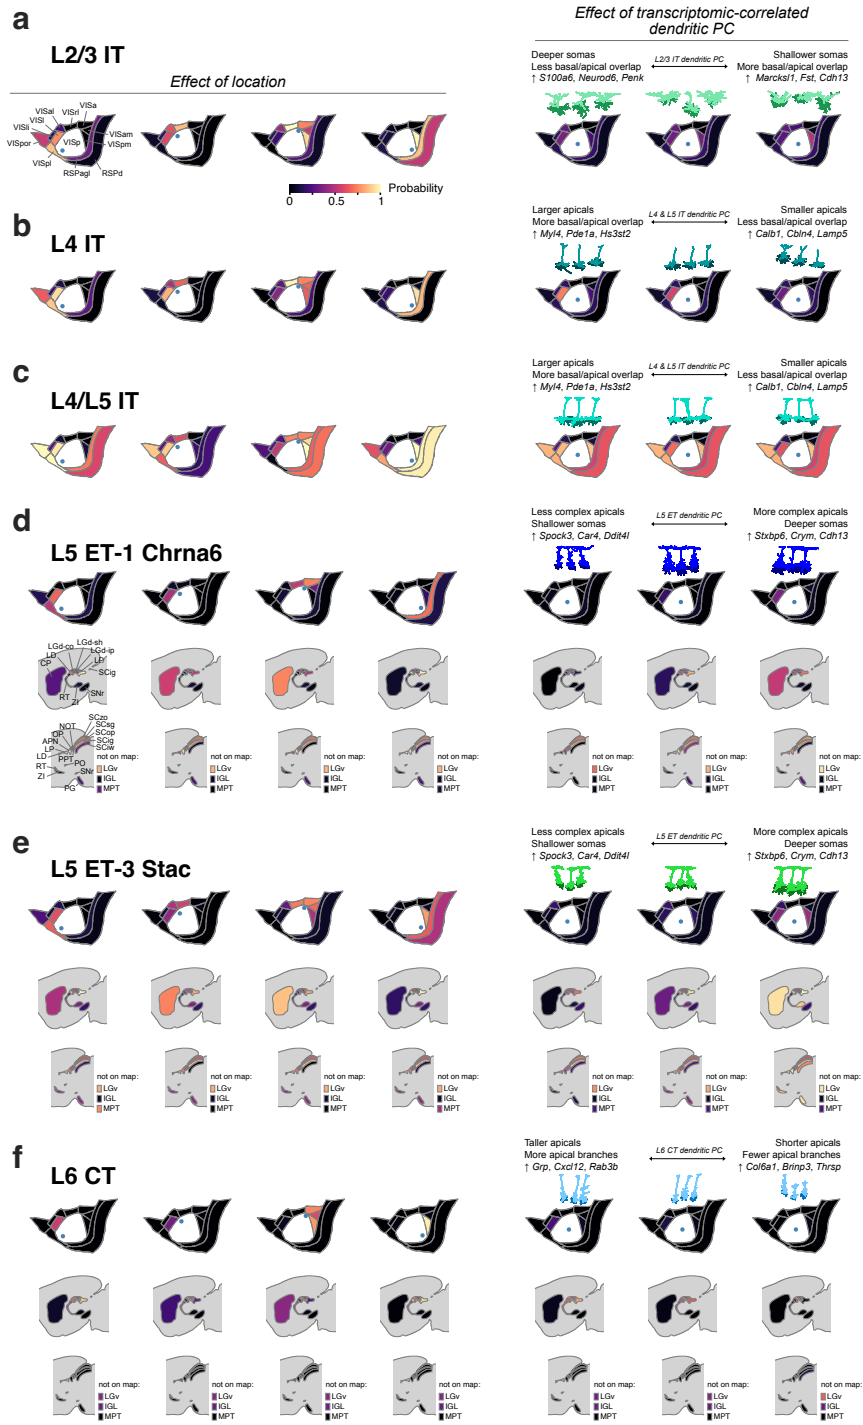

---

**Extended Data Figure 39 (preceding page): Predictions of target projections by MET-type.** **a-c**, Predicted probabilities of projecting to cortical targets from several VISp locations (left) and transcriptomic-correlated dendritic PC values (right) for L2/3 IT (**a**), L4 IT (**b**), and L4/L5 IT (**c**) MET-types. Example neurons (right, above) were chosen at low, medium, and high values of the dendritic PC range for projection probability calculations. Morphological feature variations associated with the dendritic PC and genes inferred to vary based on the corresponding Tx PC are described as well. **d-f**, Predicted probabilities of projecting to cortical and subcortical targets for L5 ET-1 Chrna6 (**d**), L5 ET-3 Stac (**e**), and L6 CT (**f**) MET-types. Effects of location and dendritic PC value are shown as in (**a**)-(c).
