# Supplementary material for: Connecting single-cell transcriptomes to projectomes in mouse visual cortex
Source: PubMed Central journal article supplement — bioRxiv. 2023 Nov 26:2023.11.25.568393. Preprint. [Version 1] doi: 10.1101/2023.11.25.568393 (PMC10760188; doi:10.1101/2023.11.25.568393), 2023-11-26
Supplement: media-5.pdf [file media-5.pdf]

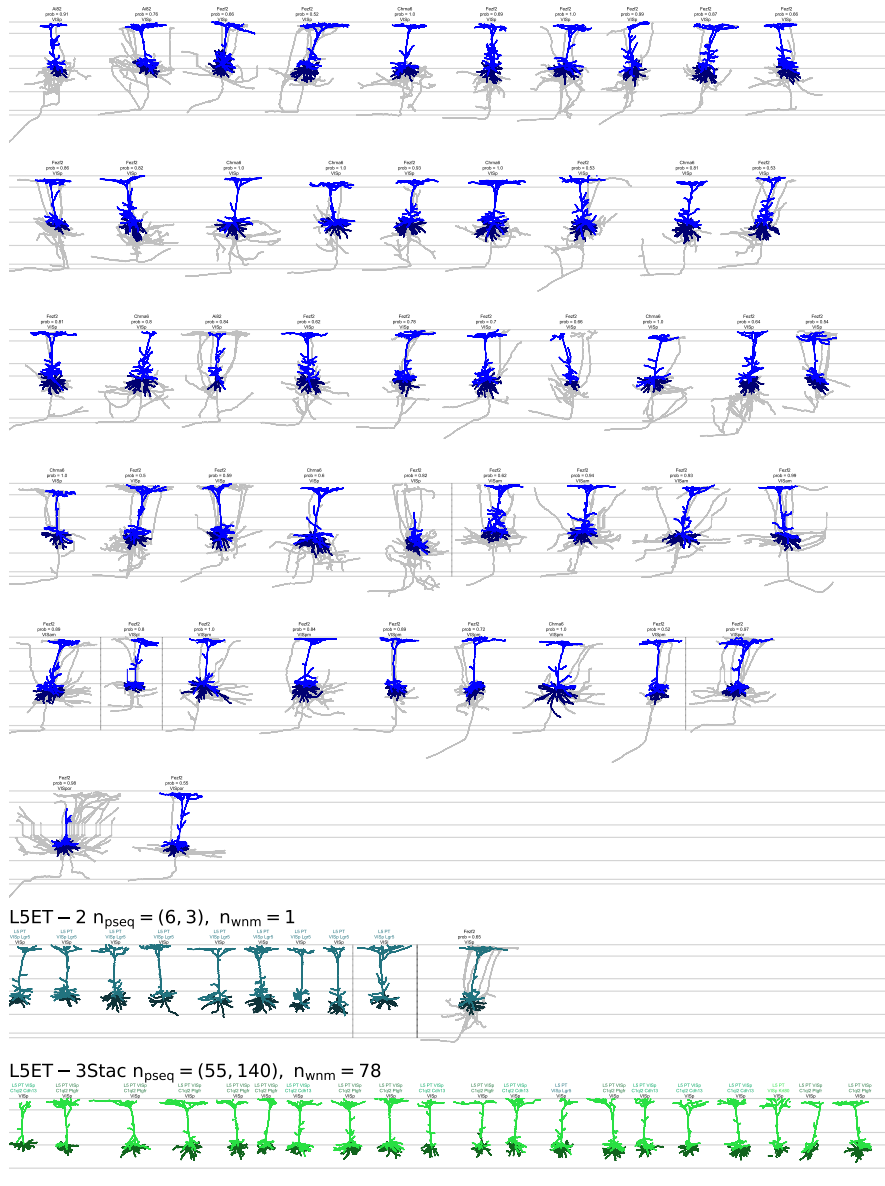

Extended Data Figure 6: Morphological reconstructions of MET-types (6 of 10)

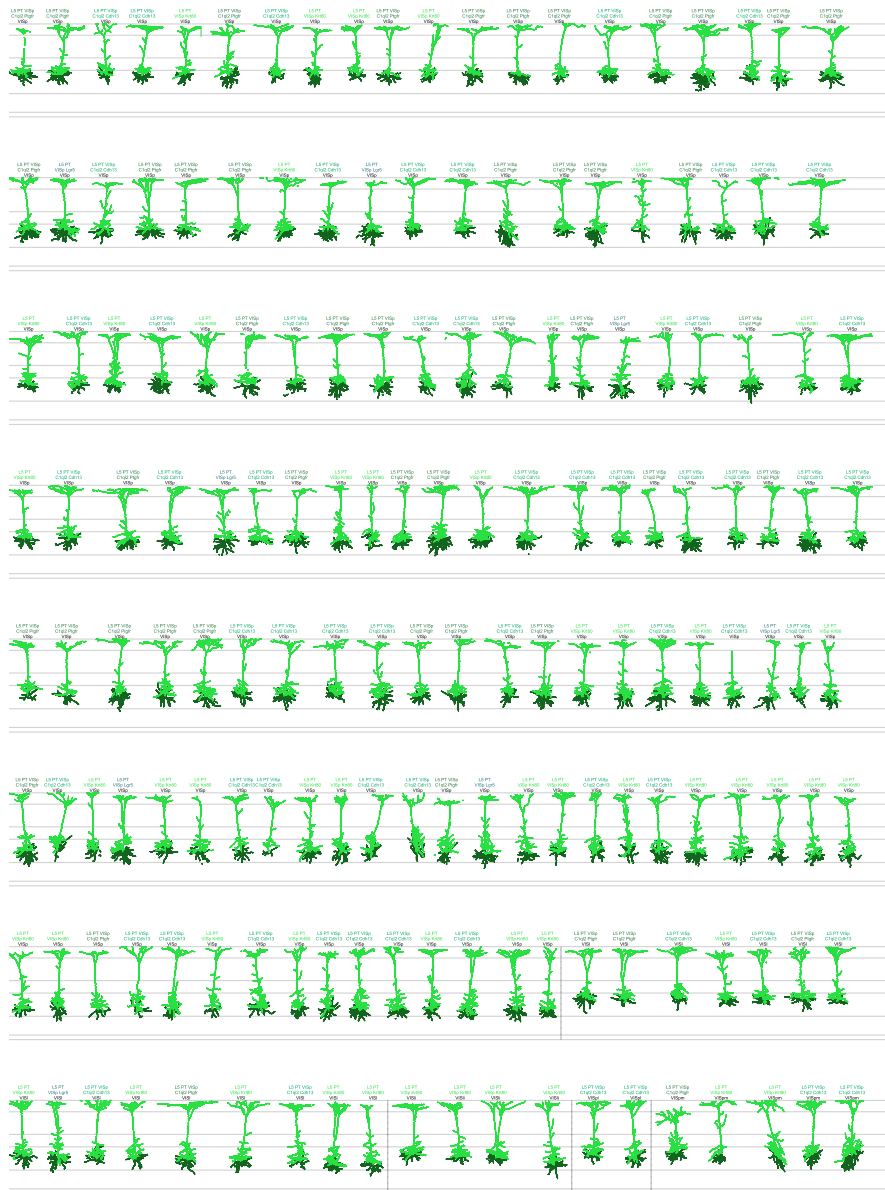

Extended Data Figure 7: Morphological reconstructions of MET-types (7 of 10)

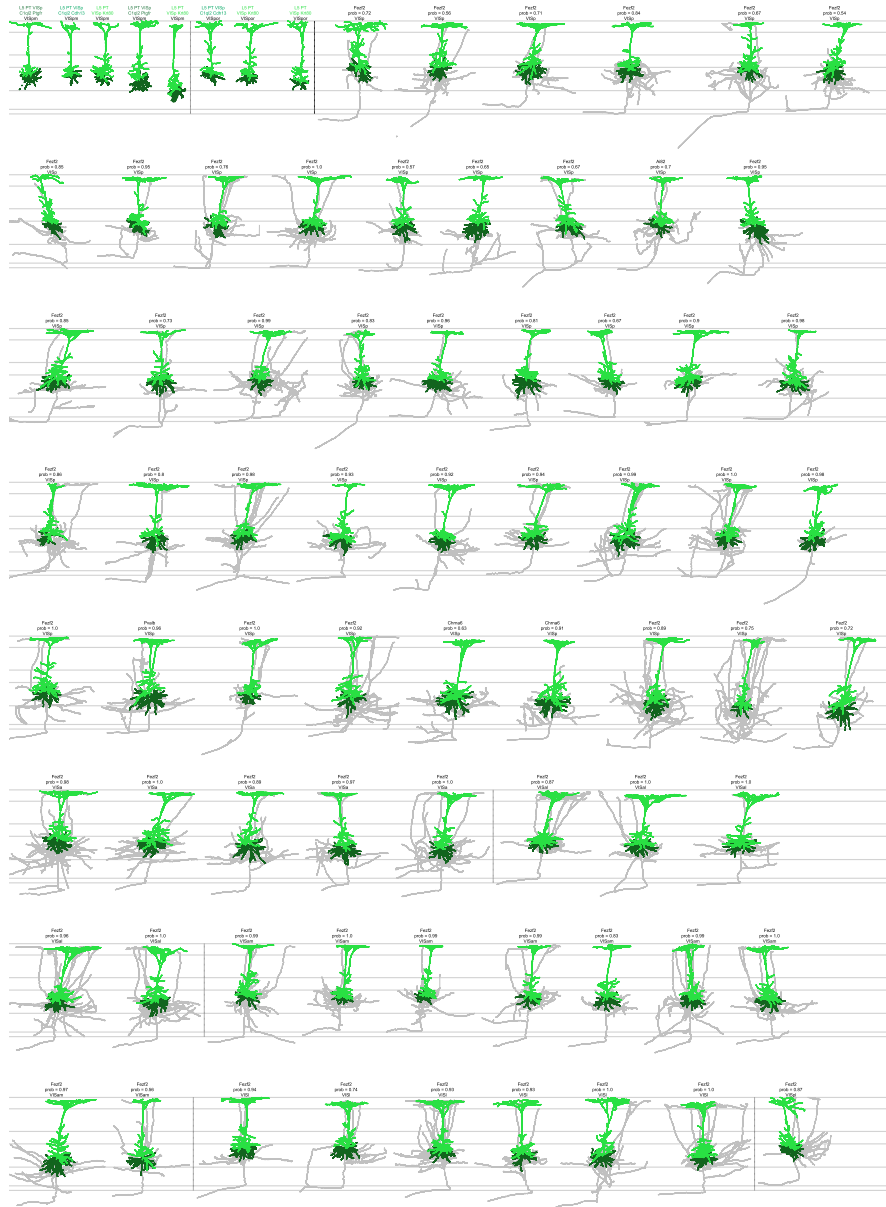

Extended Data Figure 8: Morphological reconstructions of MET-types (8 of 10)

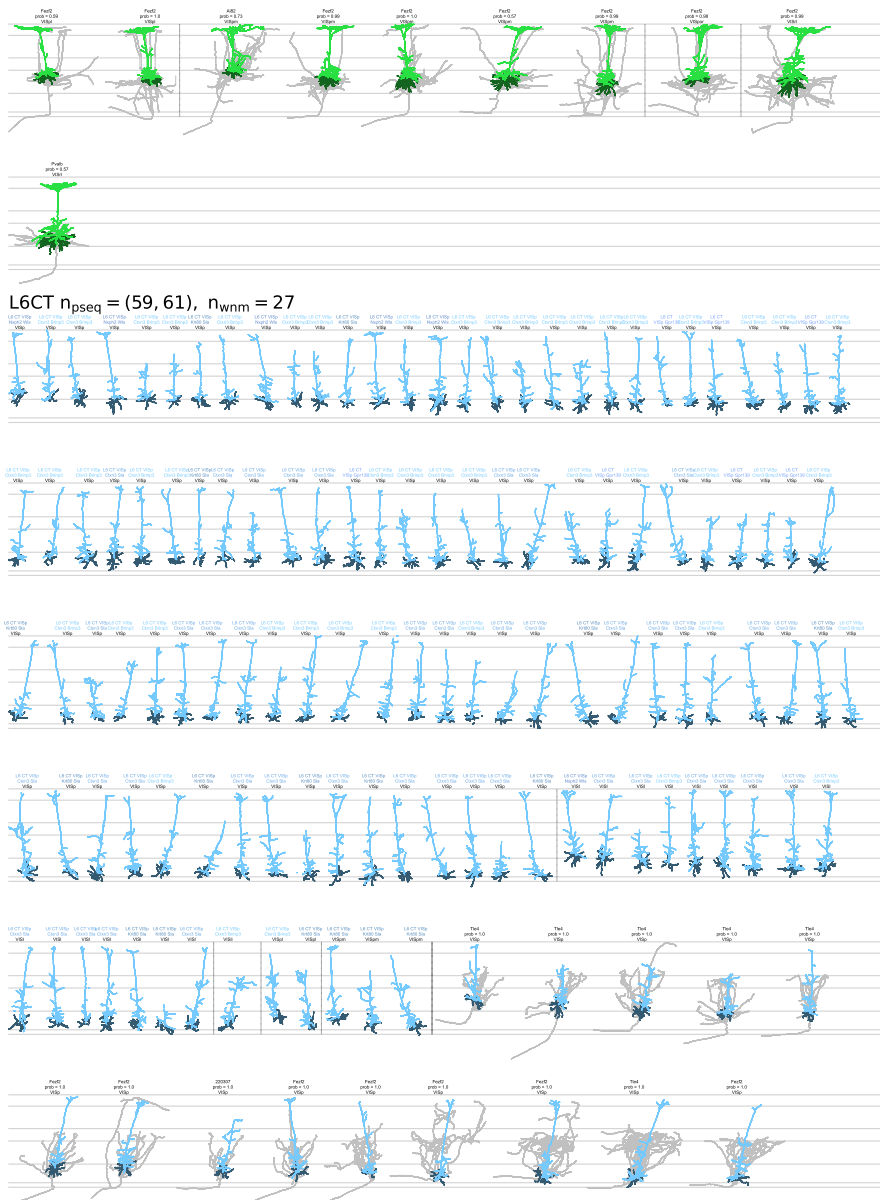

Extended Data Figure 9: Morphological reconstructions of MET-types (9 of 10)

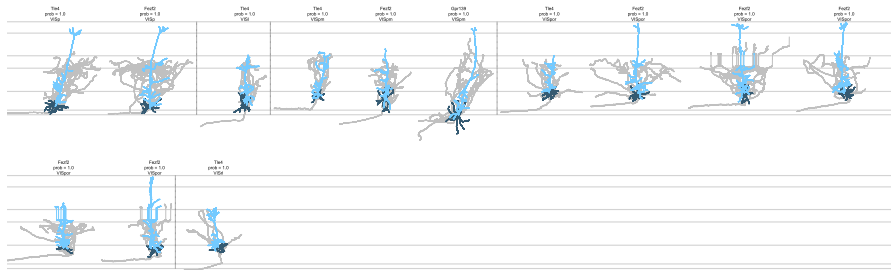

**Extended Data Figure 10: Morphological reconstructions of MET-types (10 of 10)**
