# Supplementary material for: Connecting single-cell transcriptomes to projectomes in mouse visual cortex
Source: PubMed Central journal article supplement — bioRxiv. 2023 Nov 26:2023.11.25.568393. Preprint. [Version 1] doi: 10.1101/2023.11.25.568393 (PMC10760188; doi:10.1101/2023.11.25.568393), 2023-11-26
Supplement: media-6.pdf [file media-6.pdf]

## Extended Data

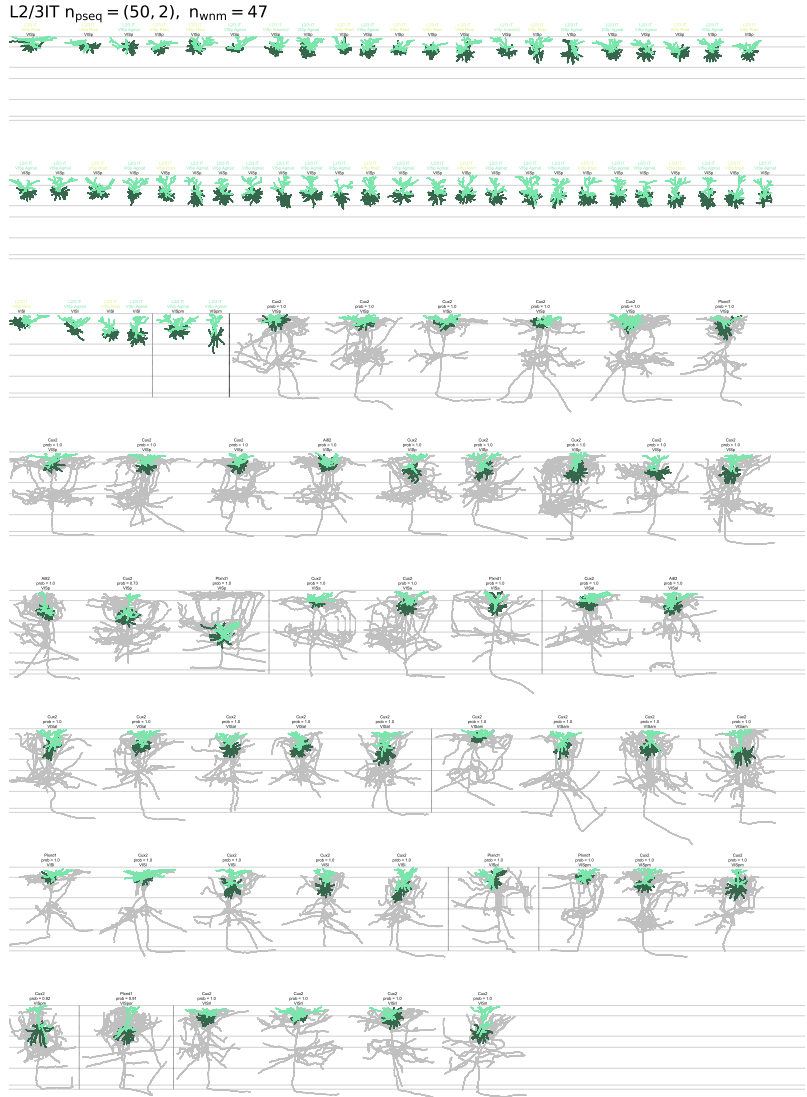

**Extended Data Figure 1: Morphological reconstructions of MET-types (1 of 10).** Sample sizes indicate the number of Patch-seq neurons (generated manually and automatically respectively) and the number of WNM neurons. Dark dashed lines separate Patch-seq and WNM morphologies, while lighter dashed lines differentiate soma structures. Patch-seq cells include transcriptomic type and soma structure annotations. WNM cells include transgenic line, MET-type prediction probability, and soma structure annotations. Apical dendrites are shaded lighter and local axon is in grey for WNM neurons.

L4IT  $n_{pseq} = (15, 17)$ ,  $n_{wnm} = 25$

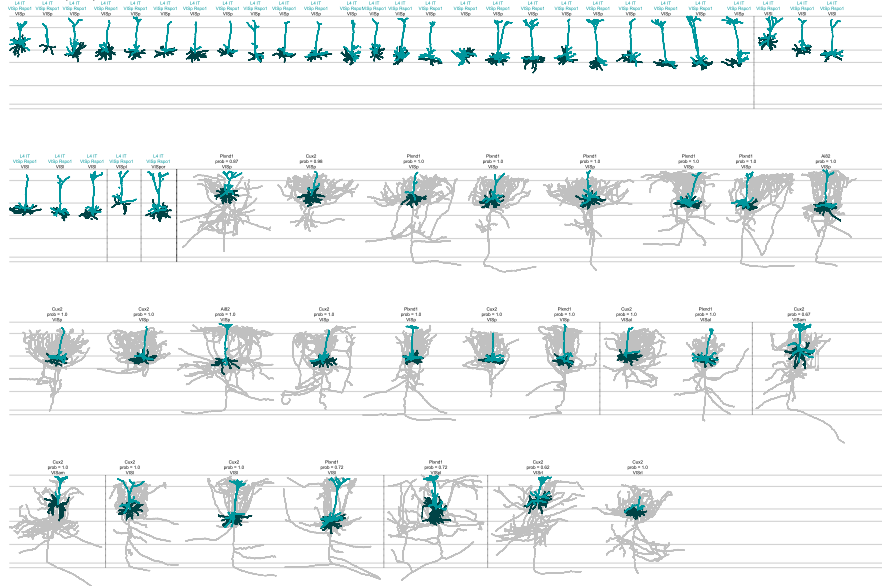

L4/L5IT  $n_{pseq} = (25, 21)$ ,  $n_{wnm} = 38$

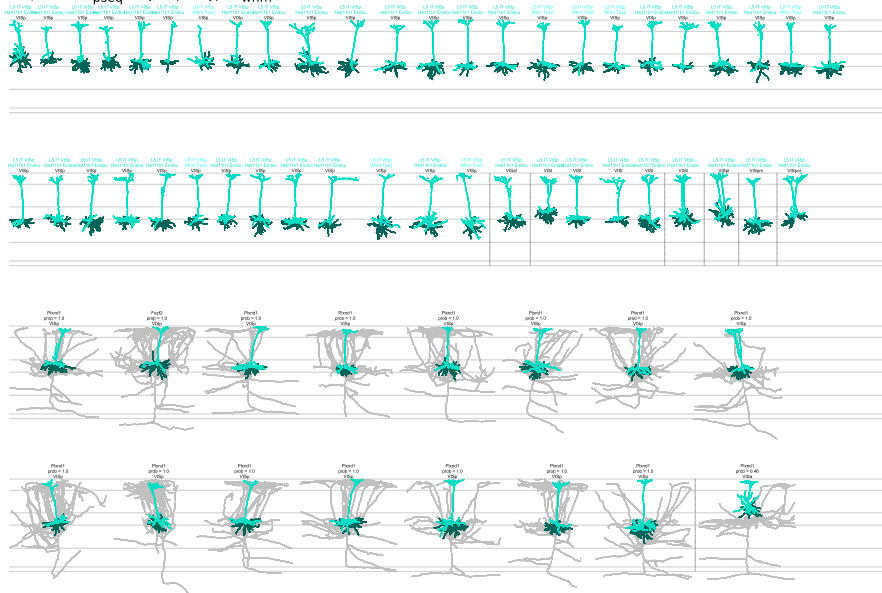

Extended Data Figure 2: Morphological reconstructions of MET-types (2 of 10)





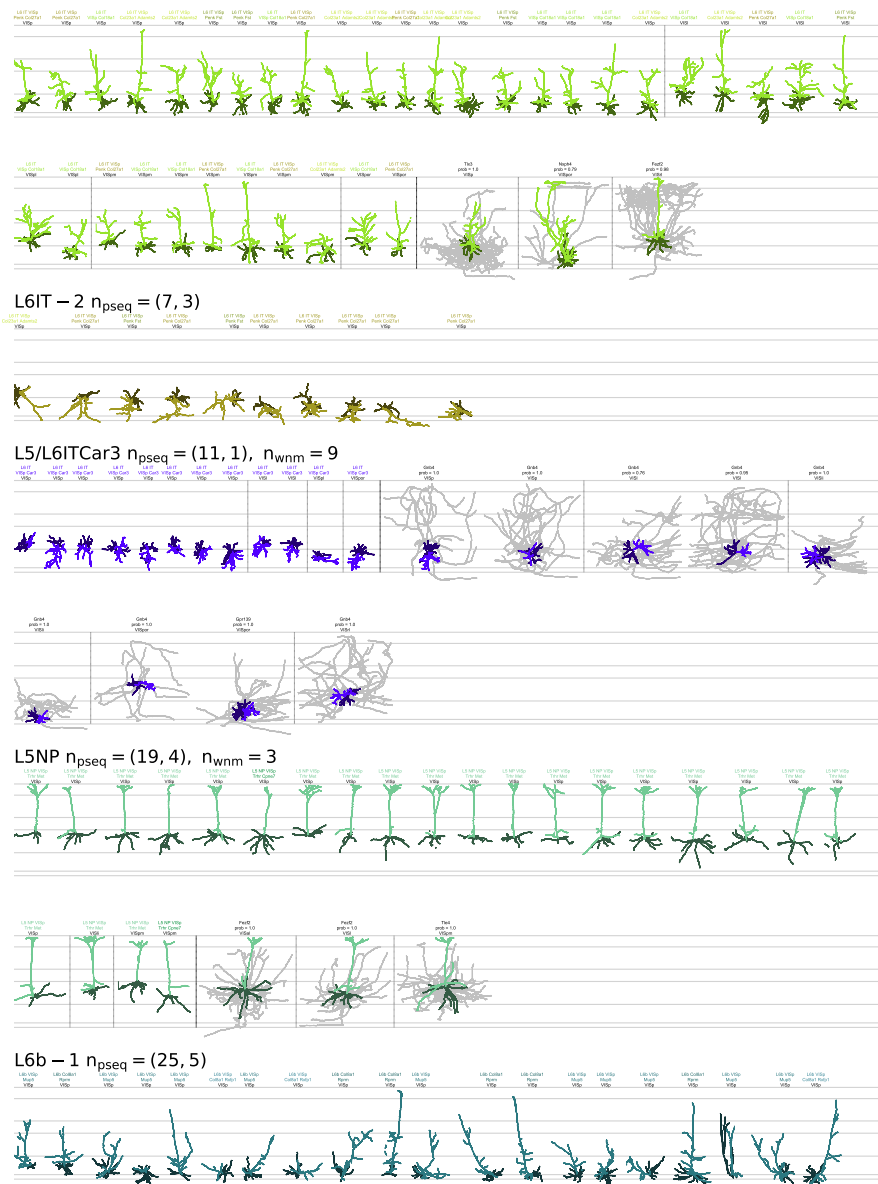

Extended Data Figure 4: Morphological reconstructions of MET-types (4 of 10)
